# Supplementary material
Source: PubMed Central journal article supplement (PMC7385997)
Supplement: NIHMS1608330-supplement-Suppl_2.pdf [file NIHMS1608330-supplement-Suppl_2.pdf]

## Cuestionario de Tinnitus y Audición

### A. Tinnitus

Durante la última semana, el tinnitus no me dejó dormir.

|  | No, no es un problema | Sí, es un problema pequeño | Sí, es un problema moderado | Sí, es un problema grande |  |
|--|-----------------------|----------------------------|-----------------------------|---------------------------|--|
|--|-----------------------|----------------------------|-----------------------------|---------------------------|--|

|  |   |   |   |   |   |
|--|---|---|---|---|---|
|  | 0 | 1 | 2 | 3 | 4 |
|--|---|---|---|---|---|

Durante la última semana, el tinnitus no me dejó concentrarme en la lectura.

|  |   |   |   |   |   |
|--|---|---|---|---|---|
|  | 0 | 1 | 2 | 3 | 4 |
|--|---|---|---|---|---|

Durante la última semana, el tinnitus no me dejó relajarme.

|  |   |   |   |   |   |
|--|---|---|---|---|---|
|  | 0 | 1 | 2 | 3 | 4 |
|--|---|---|---|---|---|

Durante la última semana, no pude dejar de pensar en mi tinnitus.

|  |   |   |   |   |   |
|--|---|---|---|---|---|
|  | 0 | 1 | 2 | 3 | 4 |
|--|---|---|---|---|---|

Total de cada columna

Total Final

### B. Audición

Durante la última semana, no podía entender lo que otros decían en lugares ruidosos o llenos.

|  |   |   |   |   |   |
|--|---|---|---|---|---|
|  | 0 | 1 | 2 | 3 | 4 |
|--|---|---|---|---|---|

Durante la última semana, no podía entender lo que la gente decía en la televisión o en las películas.

|  |   |   |   |   |   |
|--|---|---|---|---|---|
|  | 0 | 1 | 2 | 3 | 4 |
|--|---|---|---|---|---|

Durante la última semana, no pude entender a personas con voces suaves.

|  |   |   |   |   |   |
|--|---|---|---|---|---|
|  | 0 | 1 | 2 | 3 | 4 |
|--|---|---|---|---|---|

Durante la última semana, no podía entender lo que se decía en las conversaciones en grupo.

|  |   |   |   |   |   |
|--|---|---|---|---|---|
|  | 0 | 1 | 2 | 3 | 4 |
|--|---|---|---|---|---|

Total de cada columna

Total Final

### C. Tolerancia al Sonido

Durante la última semana, los sonidos eran demasiado fuertes o incómodos para mí cuando parecían normal a los demás a mi alrededor. \*

|  |   |   |   |   |   |
|--|---|---|---|---|---|
|  | 0 | 1 | 2 | 3 | 4 |
|--|---|---|---|---|---|

*Si respondió 1, 2, 3 o 4 a la pregunta anterior:*

\_\_\_\_\_

Por favor, liste dos ejemplos de sonidos que son demasiado fuertes o incómodos para usted, pero parece normal a otros:

\_\_\_\_\_

\* Si los sonidos son demasiado fuertes para usted mientras usa aparatos auditivos, por favor, dígame a su audiólogo.

Para uso de oficina solamente:  M  H  N

## Instrucciones para usar de la encuesta de Tinnitus y Audición

### Secciones A y B

Los cuatro artículos en la **subescala A (Tinnitus)** describen problemas comunes con el tinnitus que no están relacionados con problemas de audición. Los cuatro artículos en la **subescala B (Audición)** describen problemas de audición comunes que no serían causados por el tinnitus. Instrucciones paso a paso para usar la Encuesta de Tinnitus y Audición para determinar en colaboración si la intervención para el tinnitus es deseable y apropiada se proporcionan a continuación. **Con la encuesta de Tinnitus y Audición llena del paciente a la vista:**

1. **Explique que la intervención para el tinnitus puede ayudar con los problemas de la Sección A.**
2. **Explique que la intervención para el tinnitus no ayudaría con ninguno de los problemas enumerados en la Sección B**
3. **Describa qué se necesitaría para participar en la intervención de tinnitus que se ofrece (logística, costo, etc.)**
4. **Esté disponible para responder preguntas o preocupaciones sobre la intervención que se ofrece, o sobre el tinnitus en general**
5. **Permitir que el paciente decida si participara o no en la intervención**

El uso de puntajes de corte para determinar la candidatura para una intervención para el tinnitus se desaconseja, ya que promueve la toma de decisiones que no tienen en cuenta todos los factores en la vida de un paciente. El uso más efectivo de la encuesta de Tinnitus y Audición es como una herramienta para separar rápida y eficazmente los problemas de audición de los problemas de tinnitus, lo que permite al clínico describir las intervenciones disponibles en relación con los problemas específicos que experimenta el paciente. El paciente puede decidir si alguna de las intervenciones que se ofrecen es una buena combinación para su estilo de vida y para los problemas que desean asesar.

### Sección C

Los pacientes con tinnitus suelen reportar problemas de tolerancia al sonido. Los dos elementos de la **subescala C (Tolerancia del sonido)** se pueden utilizar para ayudar al clínico a desarrollar una impresión inicial sobre la existencia y el tipo de problema de tolerancia al sonido. El **artículo 1** se utiliza para detectar la existencia de un problema de tolerancia al sonido. Cualquier respuesta que no sea cero indica algún nivel de dificultad para tolerar el sonido.

El **artículo 2** tiene la intención de obtener ejemplos del paciente (que el clínico analizará con el paciente) para: (1) asegurarse de que el paciente realmente esté experimentando un problema de tolerancia al sonido (y no otra cosa); y (2) informar la opinión del clínico sobre el tipo de problema de tolerancia al sonido.

Los ejemplos para el Artículo 2 que sugieren que el paciente **puede no tener** una reacción anormal al sonido incluyen: (1) sonidos que serían demasiado fuertes para cualquiera (por ejemplo, disparos, sirena cercana); (2) referencias a problemas de tolerancia en multitudes u otras situaciones por razones distintas a la tolerancia al sonido (por ejemplo, hipervigilancia u otros síntomas de Trastorno de Estrés Posttraumático, problemas entendiendo lo que las personas dicen); y (3) quejas de los usuarios de aparatos auditivos que solo tienen problemas para tolerar los sonidos que suelen ser problemáticos para los usuarios de aparatos auditivos (por ejemplo, vajilla de plata o platos, ruidos de papel).

Después de analizar los ejemplos, si parece que el paciente tiene problemas para tolerar los sonidos que la mayoría de las personas pueden tolerar bien, entonces el clínico formará una impresión inicial acerca de si el problema de la tolerancia del sonido parece ser una hiperacusia, una misofonía o una

combinación de ambos. Use las definiciones a continuación para guiar sus impresiones mientras habla de los ejemplos del paciente.

**Hiperacusia = molestia física causada por el sonido at niveles que son cómodos para la mayoría de las personas.** Con la hiperacusia, todos los sonidos son incómodos una vez que alcanzan un cierto nivel de volumen, que varía de persona a persona con hiperacusia.

**Misofonía = reacciones emocionales al sonido.** Con la misofonía, no es la intensidad de un sonido lo que causa incomodidad (como es el caso de la hiperacusia), sino una reacción emocional al sonido que lo hace sentir incómodo. Es común que una persona con misofonía encuentre que ciertos sonidos se sienten incómodos en un nivel relativamente bajo, pero encuentra otros sonidos en el mismo nivel sean aceptables.

"Solo para uso de oficina (IE)" se refiere a las Impresiones del Entrevistador en cuanto a si la persona tiene o no un problema de tolerancia de sonido.

- Se seleccionará **M** si se sospecha de **Misofonía**.
- Se seleccionará **H** si se sospecha **Hiperacusia**.
- Se seleccionará **M y H** si ambos se sospechan.
- Si no se sospecha Ninguna de las dos condiciones, entonces se marcará **N**.
