# Supplementary material
Source: PubMed Central journal article supplement (PMC7385997)
Supplement: NIHMS1608330-supplement-Suppl_3.pdf [file NIHMS1608330-supplement-Suppl_3.pdf]

## Cuestionario de Cognición de Tinnitus

En este cuestionario, nos gustaría saber qué tipo de pensamientos le vienen a la cabeza cuando note su tinnitus. Algunos de los pensamientos que tenga pueden ser bastante negativos y otros pueden ser más positivos. Es posible que no necesariamente tenga todos los pensamientos que se enumeran a continuación, pero puede reconocer algunos que le aplican a usted. Indique la frecuencia con la que ha sido consciente de tener un pensamiento en particular en ocasiones en las que ha notado el tinnitus.

| Preguntas                                                           |                                                                          | 0 =<br>Nunca | 1 =<br>Raramente | 2 =<br>A veces | 3 = Con<br>frecuencia | 4 = Con mucha<br>frecuencia |
|---------------------------------------------------------------------|--------------------------------------------------------------------------|--------------|------------------|----------------|-----------------------|-----------------------------|
| <b>Los primeros son pensamientos más negativos que puede tener:</b> |                                                                          |              |                  |                |                       |                             |
| 1.                                                                  | Pienso, "Y si el ruido desapareciera"                                    |              |                  |                |                       |                             |
| 2.                                                                  | Pienso, "¿Por qué yo?<br>¿Por qué tengo que sufrir este horrible ruido?" |              |                  |                |                       |                             |
| 3.                                                                  | Pienso, "¿Qué hice para merecer esto?"                                   |              |                  |                |                       |                             |
| 4.                                                                  | Pienso que "El ruido hace que mi vida sea insoportable".                 |              |                  |                |                       |                             |
| 5.                                                                  | Pienso, "Nadie entiende lo malo que es el ruido"                         |              |                  |                |                       |                             |
| 6.                                                                  | Pienso, "Si solo pudiera conseguir algo de paz y tranquilidad"           |              |                  |                |                       |                             |
| 7.                                                                  | Pienso, "No puedo disfrutar de lo que estoy haciendo debido al ruido"    |              |                  |                |                       |                             |
| 8.                                                                  | Pienso, "¿Cómo puedo soportar este ruido?"                               |              |                  |                |                       |                             |
| 9.                                                                  | Pienso, "El ruido me volverá loco"                                       |              |                  |                |                       |                             |
| 10.                                                                 | Pienso, "¿Por qué nadie puede ayudarme?"                                 |              |                  |                |                       |                             |
| 11.                                                                 | Pienso, "Mi tinnitus nunca va a mejorar"                                 |              |                  |                |                       |                             |
| 12.                                                                 | Pienso, "El ruido me abrumará"                                           |              |                  |                |                       |                             |
| 13.                                                                 | Pienso, "Con este ruido, la vida no vale la pena"                        |              |                  |                |                       |                             |

| <b>Ahora, aquí hay pensamientos más positivos que puede tener:</b> |                                                                                    |  |  |  |  |  |
|--------------------------------------------------------------------|------------------------------------------------------------------------------------|--|--|--|--|--|
| 14.                                                                | Pienso, "No importa lo desagradable que sea el ruido, puedo sobrellevarlo"         |  |  |  |  |  |
| 15.                                                                | Pienso, "El ruido puede ser desagradable, pero no me volverá loco"                 |  |  |  |  |  |
| 16.                                                                | Pienso, Podré disfrutar de las cosas si mantengo mi atención fuera del ruido"      |  |  |  |  |  |
| 17.                                                                | Pienso, "No soy la única persona con tinnitus"                                     |  |  |  |  |  |
| 18.                                                                | Pienso, "Hay cosas en la vida peor que el tinnitus"                                |  |  |  |  |  |
| 19.                                                                | Pienso, "El ruido eventualmente se volverá menos molesto si trato de distraerme"   |  |  |  |  |  |
| 20.                                                                | Pienso, "He superado el ruido antes, así que puedo hacer frente de nuevo esta vez" |  |  |  |  |  |
| 21.                                                                | Me digo a mí mismo: "Me ayudará si intento pensar en algo agradable"               |  |  |  |  |  |
| 22.                                                                | Me digo a mí mismo: "Puedo aprender a vivir con eso"                               |  |  |  |  |  |
| 23.                                                                | Pienso, "el ruido podría estar allí, pero todavía puedo disfrutar de las cosas"    |  |  |  |  |  |
| 24.                                                                | Me digo a mí mismo: "Piensa en otra cosa que no sea el ruido"                      |  |  |  |  |  |
| 25.                                                                | Me digo a mí mismo: "No voy a pensar en el ruido"                                  |  |  |  |  |  |
| 26.                                                                | Pienso, "El ruido es una molestia, pero no voy a dejar que me moleste"             |  |  |  |  |  |
