# Supplementary material
Source: PubMed Central journal article supplement (PMC7385997)
Supplement: NIHMS1608330-supplement-Suppl_4.pdf [file NIHMS1608330-supplement-Suppl_4.pdf]

## Cuestionario de Cualidades de Tinnitus (CCT)

Por favor conteste las siguientes preguntas. Seleccione solo un número del 0 al 10 para cada pregunta. Seleccione números bajos (0-3) cuando no es un problema. Seleccione números altos (7-10) cuando es un problema muy grande.

### En promedio, durante la semana pasada:

1) ¿Qué tan fuerte se escuchó su tinnitus?

Muy apenas lo noté → 0 1 2 3 4 5 6 7 8 9 10 ← Muy fuerte

2) ¿Qué tan irritado está usted con el tono de su tinnitus?

Nada irritado → 0 1 2 3 4 5 6 7 8 9 10 ← Muy irritado

3) ¿Cuántos sonidos diferentes escucha?

Solo uno → 1 2 3 4 5 6 7 8 9 10 +10 ← Mas de los que puedo contar

4) ¿Qué tan seguido se dio cuenta de su tinnitus?

Casi no me di cuenta → 0 1 2 3 4 5 6 7 8 9 10 ← Siempre estoy consciente

¿Que tan consciente está de su tinnitus?

4a. En la mañana. (Seguido/ A veces/ Raramente/ Nunca)

4b. En la tarde. (Seguido/ A veces/ Raramente/ Nunca)

4c. En la noche. (Seguido/ A veces/ Raramente/ Nunca)

4d. Durante la noche. (Seguido/ A veces/ Raramente/ Nunca)

5) ¿Qué tan fácil a vivido con su tinnitus?

Fácil → 0 1 2 3 4 5 6 7 8 9 10 ← Muy difícil

6) ¿Qué tanto notó su tinnitus cuando estaba ocupado haciendo otras cosas?

No me di cuenta → 0 1 2 3 4 5 6 7 8 9 10 ← Lo noté mucho

7) ¿Qué tanto notó su tinnitus cuando había otros sonidos a su alrededor?

No me di cuenta → 0 1 2 3 4 5 6 7 8 9 10 ← Lo noté mucho

8) ¿Qué tanto afectó su estado de ánimo a su tinnitus?

No afectó → 0 1 2 3 4 5 6 7 8 9 10 ← Lo afectó mucho

9) ¿Como le afectó escuchar sonidos fuertes a su tinnitus?

No afectó → 0 1 2 3 4 5 6 7 8 9 10 ← Lo afectó mucho

10) ¿Qué tan sensible es usted hacia los sonidos que escucha a su alrededor?

Nada sensible → 0 1 2 3 4 5 6 7 8 9 10 ← Muy sensible
